# Supplementary material for: Ångström-resolution fluorescence microscopy
Source: PubMed Central journal article supplement (PMC10208979; doi:10.1038/s41586-023-05925-9), 2023-05-24
Supplement: 41586_2023_5925_MOESM2_ESM.pdf [file 41586_2023_5925_MOESM2_ESM.pdf]

TTCCCTTCCTTTCTCGCCACGTTGCGCCGGCTTTCCCGTCAAGCTCTAAATCGGGGGCTCCCTTTAGG  
GTTCCGATTTAGTGCTTTACGGCACCTCGACCCCAAAAACTTGATTTGGGTGATGGTTCACGTAGTG  
GGCCATCGCCCTGATAGACGGTTTTTCGCCCTTTGACGTTGGAGTCCACGTTCTTTAATAGTGGACTC  
TTGTTCCAAACTGGAACAACACTCAACCTATCTCGGGCTATTCTTTTGATTTATAAGGGATTTTGCC  
GATTTGCGGAACCACCATCAAACAGGATTTTCGCCTGCTGGGGCAAACCAGCGTGGACCCTTGCTGCA  
ACTCTCTCAGGGCCAGGCGGTGAAGGGCAATCAGCTGTTGCCCGTCTCACTGGTGAAAAGAAAAACCA  
CCCTGGCGCCCAATACGCAAACCGCCTCTCCCCGCGCGTTGGCCGATTCATTAATGCAGCTGGCACGA  
CAGGTTTCCCGACTGGAAAGCGGGCAGTGAGCGCAACGCAATTAATGTGAGTTAGCTCACTCATTAGG  
CACCCAGGCTTTACACTTTATGCTTCCGGCTCGTATGTTGTGGAATTGTGAGCGGATAACAATTT  
CACACAGGAAACAGCTATGACCATGATTACGAATTCGAGCTCGGTACCCGGGGATCCTCTAGAGTCGA  
CCTGCAGGCATGCAAGCTTGGCACTGGCCGTCGTTTTACAACGTCGTGACTGGGAAAACCTGGCGTT  
ACCCAATTAATCGCCTTGCAGCACATCCCCCTTTGCCAGCTGGCGTAATAGCGAAGAGGCCCGCAC  
CGATCGCCCTTCCCAACAGTTGCGCAGCCTGAATGGCGAATGGCGCTTTGCCTGGTTTTCCGGCACCAG  
AAGCGGTGCCGAAAGCTGGCTGGAGTGCATCTTCTGAGGCCGATACTGTCTGTCGTCCTCCCTCAAC  
TGCGAGATGCACGGTTACGATGCGCCCATCTACACCAACGTGACCTATCCATTACGGTCAATCCGCC  
GTTTGTTCCACGGAGAATCCGACGGGTTGTTACTCGCTCACATTTAATGTTGATGAAAGCTGGCTAC  
AGGAAGGCCAGACGCGAATTATTTTTGATGGCGTTCCTATTGGTTAAAAAATGAGCTGATTTAAAA  
AATTTAATGCGAATTTTAAACAAAATATTAACGTTTACAATTTAATATTTGCTTATACAATCTTCCTG  
TTTTTGGGGCTTTTCTGATTATCAACCGGGTACATATGATTGACATGCTAGTTTTACGATTACCGTT  
CATCGATTCTTGTGTTGCTCCAGACTCTCAGGCAATGACCTGATAGCCTTTGTAGATCTCTCAAAA  
TAGCTACCCTCTCCGGCATTATTTATCAGCTAGAACGGTTGAATATCATATTGATGGTGATTTGACT  
GTCTCCGGCCTTTCTCACCTTTTGAATCTTTACCTACACATTACTCAGGCATTGCATTTAAAAATA  
TGAGGGTTCTAAAAATTTTTATCCTTGCCTTGAATAAAGGCTTCTCCCGCAAAGTATTACAGGGTC  
ATAATGTTTTTGGTACAACCGATTTAGCTTTATGCTCTGAGGCTTTATTGCTTAATTTTGCTAATTCT  
TTGCCCTGCTGTATGATTTATTGGATGTTAATGCTACTACTATTAGTAGAATTGATGCCACCTTTTC  
AGCTCGCGCCCAAATGAAAATATAGCTAAACAGGTTATTGACCATTTGCGAAATGTATCTAATGGTC  
AACTAAATCTACTCGTTCGCAGAATTGGGAATCAACTGTTATATGGAATGAACTTCCAGACACCGT  
ACTTTAGTTGCATATTTAAAACATGTTGAGCTACAGCATTATATTCAGCAATTAAGCTCTAAGCCATC  
CGCAAAAATGACCTCTTATCAAAGGAGCAATTAAGGTAATCTCTAATCCTGACCTGTTGGAGTTTG  
CTTCCGGTCTGGTTCGCTTTGAAGCTCGAATTAACCGGATATTTGAAGTCTTCCGGGCTTCTCTT  
AATCTTTTTGATGCAATCCGCTTTGCTTCTGACTATAATAGTCAGGGTAAAGACCTGATTTTTGATT  
ATGGTCATTCTCGTTTTCTGAAGTGTAAAGCATTGAGGGGGATTCAATGAATATTTATGACGATT  
CCGAGTATTGGACGCTATCCAGTCTAAACATTTTACTATTACCCCTCTGGCAAACCTTCTTTTGCA  
AAAGCCTCTCGCTATTTTGGTTTTATCGTCGTCTGGTAAACGAGGGTTATGATAGTGTGCTCTTAC  
TATGCCTCGTAATTCCTTTTGGCGTTATGTATCTGCATTAGTTGAATGTGGTATTCCTAAATCTCAAC  
TGATGAATCTTTCTACCTGTAATAATGTTGTTCCGTTAGTTCGTTTTATTAACGTAGATTTTTCTTCC  
CAACGTCCTGACTGGTATAATGAGCCAGTCTTAAAATCGCATAAGGTAATCACAATGATTAAGTT  
GAAATTAACCATCTCAAGCCCAATTTACTACTCGTTCTGGTGTCTCGTCAGGGCAAGCCTTATTC  
ACTGAATGAGCAGCTTTGTTACGTTGATTTGGGTAATGAATATCCGGTCTTGTCAAGATTACTCTTG  
ATGAAGTCCAGCCAGCCTATGCGCCTGGTCTGTACACCGTTCATCTGTCTCTTTCAAAGTTGGTCAG  
TTCGGTTCCCTTATGATTGACCGTCTGCGCCTCGTTCGGCTAAGTAACATGGAGCAGGTCGCGGATT  
TCGACACAATTTATCAGGCGATGATACAAATCTCCGTTGTACTTTGTTTCGCGCTTGGTATAATCGCT  
GGGGTCAAAGATGAGTGTATTTAGTGTATTCTTTGCTCTTTGCTTTTAGGTTGGTGCTTCGTAGT  
GGCATTACGTATTTTACCCGTTTAAATGGAACTTCTCATGAAAAGTCTTTAGTCCTCAAAGCCTCT  
GTAGCCGTTGCTACCCTCGTTCGGATGCTGTCTTTCGCTGCTGAGGGTGACGATCCCGCAAAGCGGC  
CTTTAACTCCCTGCAAGCCTCAGCGACCGAATATATCGGTTATGCGTGGGCGATGGTTGTTGTCATTG  
TCGGCGCAACTATCGGTATCAAGCTGTTTAAAGAAATTCACCTCGAAAGCAAGCTGATAAACCGATA  
ATTAAGGCTCCTTTTGGAGCCTTTTTTTGGAGATTTTCAACGTGAAAAAATTAATTTTCGCAATTC  
CTTTAGTTGTTCTTTCTATTCTCACTCCGCTGAAACTGTTGAAAGTTGTTTAGCAAAATCCCATACA  
GAAAATTCATTTACTAACGTCTGGAAAGACGACAAAACCTTTAGATCGTTACGCTAACTATGAGGGCTG  
TCTGTGGAATGCTACAGGCGTTGTAGTTTGTACTGGTGACGAAACTCAGTGTTACGGTACATGGGTT  
CTATTGGGCTTGTATCCCTGAAAATGAGGGTGGTGGCTCTGAGGGTGGCGGTTCTGAGGGTGGCGGT  
TCTGAGGGTGGCGGTAATAACCTCCTGAGTACGGTGATACACCTATTCCGGGCTATACTTATATCAA  
CCCTCTCGACGGCACTTATCCGCCTGGTACTGAGCAAACCCCGCTAATCCTAATCCTTCTTGGAG

AGTCTCAGCCTCTTAATACTTTTCATGTTTCAGAATAATAGGTTCCGAAATAGGCAGGGGGCATTAACT  
GTTTATACGGGCACTGTTACTCAAGGCACTGACCCCGTTAAAACCTTATTACCAGTACACTCCTGTATC  
ATCAAAAAGCCATGTATGACGCTTACTGGAACGGTAAATTCAGAGACTGCGCTTCCATTCTGGCTTTA  
ATGAGGATTTATTTGTTTGTGAATATCAAGGCCAATCGTCTGACCTGCCTCAACCTCCTGTCAATGCT  
GGCGGCGGCTCTGGTGGTGGTTCTGGTGGCGGCTCTGAGGGTGGTGGCTCTGAGGGTGGCGGTTCTGA  
GGGTGGCGGCTCTGAGGGAGGCGGTTCCGGTGGTGGCTCTGGTTCCGGTGATTTTGATTATGAAAAGA  
TGGAACACGCTAATAAGGGGGCTATGACCGAAAATGCCGATGAAAACGCGCTACAGTCTGACGCTAAA  
GGCAAACCTTGATTCTGTCGCTACTGATTACGGTGTCTATCGATGGTTTCATTGGTGACGTTTCCGG  
CCTTGCTAATGGTAATGGTGTACTGGTGATTTTGTGGCTCTAATCCCAAATGGCTCAAGTCGGTG  
ACGGTGATAATTCACCTTTAATGAATAATTTCCGTCAATATTTACCTTCCCTCCCTCAATCGGTTGAA  
TGTCGCCCTTTTGTCTTTGGCGCTGGTAAACCATATGAATTTTCTATTGATTGTGACAAAATAAATCT  
ATCCGTGGTGTCTTTGCGTTTCTTTTATATGTTGCCACCTTTATGTATGTATTTTCTACGTTTGCTA  
ACATACTGCGTAATAAGGAGTCTTAATCATGCCAGTTCTTTTGGGTATTCCGTTATTATTGCGTTTCC  
TCGGTTTCTTCTGGTAACCTTTGTTCCGGCTATCTGCTTACTTTTCTTAAAAAGGGCTTCGGTAAGATA  
GCTATTGCTATTTTATTGTTTCTTGTCTTATTATTGGGCTTAACTCAATTCTTGTGGGTTATCTCTC  
TGATATTAGCGCTCAATTACCCTCTGACTTTGTTGAGGGTGTTCAGTTAATTCTCCCGTCTAATGCGC  
TTCCCTGTTTTTATGTTATTCTCTCTGTAAAGGCTGCTATTTTCATTTTGACGTTAAACAAAAAATC  
GTTTCTTATTTGGATTGGGATAAATAATATGGCTGTTTATTTTGTAACTGGCAAATTAGGCTCTGGAA  
AGACGCTCGTTAGCGTTGGTAAGATTCAGGATAAAATTGTAGCTGGGTGCAAATAGCAACTAATCTT  
GATTTAAGGCTTCAAACCTCCCACAAGTCGGGAGGTTGCTAAAACGCCTCGCGTTCTTAGAATACC  
GGATAAGCCTTCTATATCTGATTTGCTTGTATTGGGCGCGGTAATGATTCTACGATGAAAATAAAA  
ACGGCTTGCTTGTCTCGATGAGTGCGGTACTTGGTTTAAATACCCGTTCTTGGAAATGATAAGGAAAGA  
CAGCCGATTATTGATTGTTTCTACATGCTCGTAAATTAGGATGGGATATTATTTTTCTTGTTCAGGA  
CTTATCTATTGTTGATAAACAGGCGGTTCTGCATTAGCTGAACATGTTGTTTATTGTGTCGTCGCTGG  
ACAGAATTACTTTACCTTTTGTGCGTACTTTATATTCTCTTATTACTGGCTCGAAAATGCCTCTGCCT  
AAATTACATGTTGGCGTTGTTAAATATGGCGATTCTCAATTAAGCCCTACTGTTGAGCGTTGGCTTTA  
TACTGGTAAGAATTTGTATAACGCATATGATACTAAACAGGCTTTTTCTAGTAATTATGATTCCGGTG  
TTTATTCTTATTTAACGCCTTATTTATCACACGGTCGGTATTTCAAACCATTAATTTAGGTCAGAAG  
ATGAAATTAATAAAATATATTTGAAAAAGTTTTCTCGCGTTCTTTGTCTTGGCATTGGATTTGCATC  
AGCATTTACATATAGTTATATAACCCAACCTAAGCCGGAGGTTAAAAGGTAGTCTCTCAGACCTATG  
ATTTTGATAAATTAATTAATAGCGACGATTTACAGAAGCAAGGTTATTTCACTCACATATATTGATTT  
ATGTACTGTTTCCATTAATAAAGGTAATTCAAATGAAATTGTTAAATGTAATTAATTTGTTTTCTTG  
ATGTTTGTTCATCATCTTCTTTTGTCTCAGGTAATTGAAATGAATAATTCGCCTCTGCGCGATTTTGT  
AACTTGGTATTCAAAGCAATCAGGCGAATCCGTTATTGTTTCTCCCGATGTAAAAGGTAAGTACTGTTACTG  
TATATTCATCTGACGTTAAACCTGAAAATCTACGCAATTTCTTTATTTCTGTTTTACGTGCAAATAAT  
TTTGATATGGTAGGTTCTAACCCTTCCATTATTCAGAAGTATAATCAAACAATCAGGATTATATTGA  
TGAATTGCCATCATCTGATAATCAGGAATATGATGATAATTCGCTCCTTCTGGTGGTTTCTTTGTTT  
CGCAAAATGATAATGTTACTCAAACCTTTAAAATTAATAACGTTTCGGGCAAAGGATTTAATACGAGTT  
GTCGAATTGTTTGTAAAGTCTAATACTTCTAAATCCTCAAATGTATTATCTATTGACGCTCTAATCT  
ATTAGTTGTTAGTGCTCCTAAAGATATTTTAGATAACCTTCTCAATTCCTTTCACTGTTGATTTGC  
CAACTGACCAGATATTGATTGAGGGTTTGATATTTGAGGTTGAGCAAGGTGATGCTTTAGATTTTCA  
TTTGTCTGCTGGCTCTCAGCGTGGCACTGTTGCAGGCGGTGTTAATACTGACCGCCTCACCTCTGTTTT  
ATCTTCTGCTGGTGGTTCGTTCCGGTATTTTAAATGGCGATGTTTTAGGGCTATCAGTTCGCGCATTAA  
AGACTAATAGCCATTCAAAAATATTGTCTGTGCCACGTATTCTTACGCTTTCAGGTGAGAAGGGTCT  
ATCTCTGTTGGCCAGAATGTCCCTTTTATTACTGGTGTGACTGGTGAATCTGCCAATGTAAATAA  
TCCATTTGACGATTGAGCGTCAAATGTAGGATTTCCATGAGCGTTTTTCTGTTGCAATGGCTG  
CGGTAATATTGTTCTGGATATTACCAGCAAGGCCGATAGTTTG
