# Supplementary material for: Ångström-resolution fluorescence microscopy
Source: PubMed Central journal article supplement (PMC10208979; doi:10.1038/s41586-023-05925-9), 2023-05-24
Supplement: 41586_2023_5925_MOESM3_ESM.pdf [file 41586_2023_5925_MOESM3_ESM.pdf]

TGATAGACGGTTTTTCGCCCTTTGACGTTGGAGTCCACGTTCTTTAATAGTGGACTCTTGTTCCAAAC  
TGGAACAACACTCAACCCTATCTCGGGCTATTCTTTTGATTTATAAGGGATTTTGCCGATTTTCGGAAC  
CACCATCAAACAGGATTTTCGCCTGCTGGGGCAAACCAGCGTGGACCGCTTGCTGCAACTCTCTCAGG  
GCCAGGCGGTGAAGGGCAATCAGCTGTTGCCCGTCTCACTGGTGAAAAGAAAAACCACCCTGGCGCCC  
AATACGCAAACCGCCTCTCCCCGCGGTTGGCCGATTCATTAATGCAGCTGGCAGCAGGTTTCCCG  
ACTGGAAAGCGGGCAGTGAGCGCAACGCAATTAATGTGAGTTAGCTCACTCATTAGGCACCCCAGGCT  
TTACACTTTATGCTTCCGGCTCGTATGTTGTGTGGAATTGTGAGCGGATAACAATTTACACAGGAAA  
CAGCTATGACCATGATTACGAATTCGAGCTCGGTACCCGGGATCCTCCGTCTTTATCGAGGTAACAA  
GCACCACGTAGCTTAAGCCCTGTTTACTCATTACACCAACCAGGAGGTCAGAGTTCGGAGAAATGATT  
TATGTGAAATGCGTCAGCCGATTCAAGGCCCTATATTCGTGCCACCGACGAGTTGCTTACAGATGG  
CAGGGCCGCACTGTCGGTATCATAGAGTCACTCCAGGGCGAGCGTAAATAGATTAGAAGCGGGGTTAT  
TTTGGCGGGACATTGTCATAAGGTTGACAATTCAGCACTAAGGACACTTAAGTCGTGCGCATGAATTC  
ACAACCCTTAGAAGAACATCCACCCTGGCTTCTCCTGAGAAAGCTTGGCACTGGCCGTGCTTTTACA  
ACGTCGTGACTGGGAAAACCCTGGCGTTACCCAATTAATCGCCTTGAGCACATCCCCCTTTCCGCA  
GCTGGCGTAATAGCGAAGAGGCCCGCACCGATCGCCCTTCCAACAGTTGCGCAGCCTGAATGGCGAA  
TGGCGCTTTGCCTGGTTTCCGGCACCGAAGCGGTGCCGAAAGCTGGCTGGAGTGCATCTTCCTGA  
GGCCGATACTGTCGTGTCGCCCTCAAACCTGGCAGATGCACGTTACGATGCGCCATCTACACCAACG  
TGACCTATCCATTACGGTCAATCCGCCGTTTGTTCACGGAGAATCCGACGGGTTGTTACTCGCTC  
ACATTTAATGTTGATGAAAGCTGGCTACAGGAAGGCCAGACGCGAATTATTTTTGATGGCGTTCCTAT  
TGGTTAAAAAATGAGCTGATTTAACAAAAATTAATGCGAATTTTAACAAAAATTAACGTTTACAAT  
TTAAATATTTGCTTATACAATCTTCCTGTTTTTGGGGCTTTTCTGATTATCAACCGGGGTACATATGA  
TTGACATGCTAGTTTTACGATTACCGTTCATCGATTCTCTTGTGTTGCTCCAGACTCTCAGGCAATGAC  
CTGATAGCCTTTGTAGATCTCTCAAAAATAGCTACCCTCTCCGGCATTAAATTTATCAGCTAGAACGGT  
TGAATATCATATTGATGGTGATTTGACTGTCTCCGGCCTTTCTCACCTTTTGAATCTTTACCTACAC  
ATTACTCAGGCATTGCATTTAAAATATATGAGGGTCTAAAAATTTTTATCCTTGCGTTGAAATAAAG  
GCTTCTCCCGCAAAGTATTACAGGGTCATAATGTTTTTGGTACAACCGATTTAGCTTTATGCTCTGA  
GGCTTTATTGCTTAATTTTGCTAATTTGCCTTGCTGATGATTTATTGGATGTTAATGCTACTA  
CTATTAGTAGAATTGATGCCACCTTTTCAGCTCGCGCCCAAATGAAAATATAGCTAAACAGGTTATT  
GACCATTTGCGAAATGTATCTAATGGTCAAACCTAAATCTACTCGTTTCGAGAAATGGGAATCAACTGT  
TATATGGAATGAAACTTCAGACACCGTACTTTAGTTGCATATTTAAAACATGTTGAGCTACAGCATT  
ATATTCAGCAATTAAGCTCTAAGCCATCCGCAAAAATGACCTTTATCAAAAGGAGCAATTAAGGTA  
CTCTCTAATCCTGACCTGTTGGAGTTTGTCTCCGGTCTGGTTGCTTTGAAGCTCGAATTAACGCG  
ATATTTGAAGTCTTTCCGGGCTTCTCTTAATCTTTTTGATGCAATCCGCTTTGCTTCTGACTATAATA  
GTCAGGGTAAAGACCTGATTTTTGATTTATGGTCAATCTCGTTTTCTGAACTGTTTAAAGCATTGAG  
GGGGATTCAATGAATATTTATGACGATTCCGCAGTATTGGACGCTATCCAGTCTAAACATTTTACTAT  
TACCCCTCTGGCAAACCTTTTTGCAAAGCCTCTCGCTATTTTGGTTTTTATCGTCGTCTGGTAA  
ACGAGGGTTATGATAGTGTGCTCTTACTATGCCTCGTAATTCCTTTTGGCGTTATGTATCTGCATTA  
GTTGAATGTGGTATTCCTAAATCTCAACTGATGAATCTTTCTACCTGTAATAATGTTGTTCCGTTAGT  
TCGTTTTATTAACGTAGATTTTTCTTCCCAACGTCTGACTGGTATAATGAGCCAGTCTTAAAATCG  
CATAAGGTAATTCACAATGATTAAGTTGAAATTAACCATCTCAAGCCCAATTTACTACTCGTTCTG  
GTGTTTTCTGTCAGGGCAAGCCTTATTCAGTGAATGAGCAGCTTTGTTACGTTGATTTGGGTAATGAA  
TATCCGGTCTTGTCAAGATTACTCTTGATGAAGGTCAGCCAGCCTATGCGCCTGGTCTGTACACCGT  
TCATCTGCTCTTTCAAAGTTGGTCAGTTCGGTTCCTTATGATTGACCGTCTGCGCCTCGTTCCGG  
CTAAGTAACATGGAGCAGGTCGCGGATTTGACACAATTTATCAGGCGATGATACAAATCTCCGTTGT  
ACTTTGTTTCGCGCTTGGTATAATCGCTGGGGGTCAAAGATGAGTGTTTTAGTGATTCTTTTGCCTC  
TTTCGTTTTAGGTTGGTGCCTTCGTAGTGGCATTACGTATTTTACCCGTTTAAATGAAACTTCTCAT  
GAAAAAGTCTTTAGTCTCAAAGCCTCTGTAGCCGTTGCTACCCTCGTTCGATGCTGTCTTTTCGCTG  
CTGAGGGTGACGATCCCGCAAAGCGGCCTTTAACTCCCTGCAAGCCTCAGCGACCGAATATATCGGT  
TATGCGTGGGCGATGGTTGTTGTCATTGTGCGGCGCAACTATCGGTATCAAGCTGTTAAGAAATTCAC  
CTCGAAAGCAAGCTGATAAACCAGATACAATTAAGGCTCCTTTTGGAGCCTTTTTTTTGGAGATTTTC  
AACGTGAAAAAATTATTATTCGAATTCCTTTAGTTGTTCTTTTCTATTCTCACTCCGCTGAAACTGT  
TGAAAGTTGTTTAGCAAAATCCCATACAGAAAATTCATTTACTAACGTCTGAAAGACGACAAAACCTT  
TAGATCGTTACGCTAACTATGAGGGCTGTCTGTGGAATGCTACAGGCGTTGTAGTTTGTACTGGTGAC  
GAAACTCAGTGTTACGGTACATGGGTTCTATTGGGCTTGCTATCCCTGAAAATGAGGGTGGTGGCTC

TGAGGGTGGCGGTTCTGAGGGTGGCGGTTCTGAGGGTGGCGGTTACTAAACCTCCTGAGTACGGTGATA  
CACCTATCCGGGCTATACTTATATCAACCCTCTCGACGGCACTTATCCGCCTGGTACTGAGCAAAC  
CCCCTAATCCTAATCCTTCTCTTGAGGAGTCTCAGCCTCTTAATACTTTTCATGTTTCAGAATAATAG  
GTTCCGAAATAGGCAGGGGGCATTAACTGTTTATACGGGCCTGTTACTCAAGGCCTGACCCCGTTA  
AAACTTATTACCAGTACACTCCTGTATCATCAAAGCCATGTATGACGCTTACTGGAACGGTAAATTC  
AGAGACTGCGCTTTCCATTCTGGCTTTAATGAGGATTTATTTGTTTGTGAATATCAAGGCCAATCGTC  
TGACCTGCCTCAACCTCCTGTCAATGCTGGCGGCGGCTCTGGTGGTGGTTCTGGTGGCGGCTCTGAGG  
GTGGTGGCTCTGAGGGTGGCGGTTCTGAGGGTGGCGGCTCTGAGGGAGGCGGTTCCGGTGGTGGCTCT  
GGTTCCGGTGATTTTGATTATGAAAAGATGGCAAACGCTAATAAGGGGGCTATGACCGAAAATGCCGA  
TGAAAACGCGCTACAGTCTGACGCTAAAGGCAAACCTTGATTCTGTCGCTACTGATTACGGTGCTGCTA  
TCGATGGTTTCATTGGTGACGTTTCCGGCCTTGCTAATGGTAATGGTGTACTGGTGATTTTGTGGC  
TCTAATTCCCAAATGGCTCAAGTCGGTGACGGTGATAATTCACCTTTAATGAATAATTTCCGTCAATA  
TTTACCTCCCTCCCTCAATCGGTTGAATGTCGCCCTTTTGTCTTTGGCGCTGGTAAACCATATGAAT  
TTTCTATTGATTGTGACAAAATAAACTTATTCCGTGGTGTCTTTGCGTTTCTTTATATGTTGCCACC  
TTTATGTATGATTTTTCTACGTTTGCTAACATACTGCGTAATAAGGAGTCTTAATCATGCCAGTTCTT  
TTGGGTATTCCGTTATTATTGCGTTTCTCGGTTTCTTCTGGTAACTTTGTTCCGGCTATCTGCTTAC  
TTTTCTTAAAAAGGGCTTCGGTAAGATAGCTATTGCTATTTTCATTGTTTCTTGTCTTATTATTGGGC  
TAACTCAATTCTTGTGGGTTATCTCTCTGATATTAGCGCTCAATTACCCTCTGACTTTGTTCAAGGT  
GTTCAAGTAACTTCTCCCGTCTAATGCGCTTCCCTGTTTTATGTTATTCTCTCTGTAAAGGCTGCTAT  
TTTCATTTTTGACGTTAAACAAAAAATCGTTTCTTATTTGGATTGGGATAAATAATATGGCTGTTTAT  
TTTGTAACTGGCAAATTAGGCTCTGGAAAGACGCTCGTTAGCGTTGGTAAGATTCAAGGATAAAATTGT  
AGCTGGGTGCAAATAGCAACTAATCTTGATTTAAGGCTTCAAACCTCCCGCAAGTCGGGAGTTTCG  
CTAAAACGCCTCGCGTTCTTAGAATACCGGATAAGCCTTCTATATCTGATTTGCTTGTATTGGGCGC  
GGTAATGATTCTACGATGAAAATAAAAAAGGCTTGGTTGTTCTCGATGAGTGCGGTACTTGGTTTAA  
TACCCGTTCTTGAATGATAAGGAAAGACAGCCGATTATTGATTGGTTTCTACATGCTCGTAAATTAG  
GATGGGATATTATTTTTCTGTTTCAAGACTTATCTATTGTTGATAAACAGGCGGTTCTGCATTAGCT  
GAACATGTTGTTTATTGTCGTCGTCTGGACAGAATTACTTTACCTTTTGTGCGTACTTTATATTCTCT  
TATTACTGGCTCGAAAATGCCTCTGCCTAAATTACATGTTGGCGTTGTTAAATATGGCGATTCTCAAT  
TAAGCCCTACTGTTGAGCGTTGGCTTTATACTGGTAAGAATTTGTATAACGCATATGATACTAAACAG  
GCTTTTTCTAGTAATTATGATTCCGGTGTATTCTTATTTAACGCCTTATTTATCACACGGTCGGTA  
TTTCAAACCATTAATTTAGGTCAGAAGATGAAATTAATAAATAATATTTGAAAAGTTTTCTCGCG  
TTCTTTGTCTTGGCATTGGATTTGCATCAGCATTACATATAGTTATATAACCCAACCTAAGCCGGAG  
GTTAAAAAGGTAGTCTCTCAGACCTATGATTTTGATAAATTCATATTGACTCTTCTCAGCGTCTTAA  
TCTAAGCTATCGCTATGTTTTCAAGGATTCTAAGGGAAAATTAATTAATAGCGACGATTTACAGAAGC  
AAGGTTATTCACCTCACATATATTGATTTATGTACTGTTTCCATTAATAAAGGTAATTCAAATGAAATT  
GTTAAATGTAATTAATTTTGTCTTCTGATGTTTGTTCATCATCTTCTTTTGTCTCAGGTAATTGAAA  
TGAATAATTCGCCTCTGCGGATTTTGTAACTTGGTATTCAAAGCAATCAGGCGAATCCGTTATTGTT  
TCTCCCGATGTAAAAGGTACTGTTACTGTATATTCTGACGTTAAACCTGAAAATCTACGCAATTT  
CTTTATTTCTGTTTTACGTGCAAATAATTTTGTATGTTAGGTTCTAACCTTCCATTATTCAGAAGT  
ATAATCCAAACAATCAGGATTATATTGATGAATTGCCATCATCTGATAATCAGGAATATGATGATAAT  
TCCGCTCCTTCTGGTGGTTTCTTTGTTCCGCAAATGATAATGTTACTCAAACTTTTAAAATTAATAA  
CGTTCCGGGCAAAGGATTTAATACGAGTTGTGCAATTGTTTGTAAAGTCTAATACTTCTAAATCCTCAA  
ATGTATTATCTATTGACGGCTCTAATCTATTAGTTGTTAGTGCTCCTAAAGATATTTTAGATAACCTT  
CCTCAATTCCTTTCAACTGTTGATTTGCCAACTGACCAGATATTGATTGAGGGTTTGATTTGAGGT  
TCAGCAAGGTGATGCTTTAGATTTTTCAATTTGCTGCTGGCTCTCAGCGTGGCACTGTTGCAGGCGGTG  
TTAATACTGACCGCCTCACCTCTGTTTTATCTTCTGCTGGTGGTTCTGTTCCGGTATTTTTAATGGCGAT  
GTTTTAGGGCTATCAGTTCGCGCATTAAAGACTAATAGCCATTCAAAAATATTGTCTGTGCCACGTAT  
TCTTACGCTTTCAAGGTCAGAAGGTTCTATCTCTGTTGGCCAGAATGTCCCTTTTATTACTGGTCTGTG  
TGACTGGTGAATCTGCCAATGTAAATAATCCATTTCAAGCATTGAGCGTCAAATGTAGGTATTTCC  
ATGAGCGTTTTTCTGTTGCAATGGCTGGCGGTAATATTGTTCTGGATATTACCAGCAAGGCCGATAG  
TTTGAGTTCTTCTACTCAGGCAAGTGATGTTATTACTAATCAAAGAAGTATTGCTACAACGGTTAATT  
TGCGTGATGGACAGACTCTTTTACTCGGTGGCCTCACTGATTATAAAAAACTTCTCAGGATTCTGGC  
GTACCGTTCCTGTCTAAAATCCCTTTAATCGGCCTCCTGTTTAGCTCCCGCTCTGATTCTAACGAGGA  
AAGCACGTTATACGTGCTCGTCAAAGCAACCATAGTACGCGCCTGTAGCGGCGCATTAAAGCGCGCGC

GGTGTGGTGGTTACGCGCAGCGTGACCGCTACACTTGCCAGCGCCCTAGCGCCCCTCCTTTTCGCTTT  
CTTCCCTTCCTTTCTCGCCACGTTGCGCGGCTTTCCCGTCAAGCTCTAAATCGGGGGCTCCCTTTAG  
GGTCCGATTTAGTGCTTTACGGCACCTCGACCCAAAAAACTTGATTTGGGTGATGGTTCACGTAGT  
GGCCATCGCCC
